# Supplementary material
Source: HighWire-hosted journal article supplement (http://www.qdcxjkg.com/highwire/filestream/131505/field_highwire_adjunct_files/0/ERJ-01966-2015_Supplement.pdf)
Supplement: ERJ-01966-2015_Supplement.pdf [file ERJ-01966-2015_Supplement.pdf]

1 **SUPPLEMENTARY MATERIAL**

2 **Table S1.** Assessment of disease progression—proportions of patients experiencing ≥10%  
 3 decline in FVC or death, ≥50-m decline in 6MWD or death and ≥20-point worsening of UCSD  
 4 SOBQ score or death in the pooled placebo population stratified by baseline FVC (≥80% and  
 5 <80% predicted) or baseline GAP index stage (GAP I and GAP II–III) at 12 months

| <b>Outcome at 12 Months</b>                  | <b>Baseline FVC ≥80%</b> | <b>Baseline FVC &lt;80%</b> | <b>Baseline GAP Stage I</b> | <b>Baseline GAP Stage II-III</b> |
|----------------------------------------------|--------------------------|-----------------------------|-----------------------------|----------------------------------|
| Pooled placebo population, n                 | 170                      | 454                         | 235                         | 387                              |
| FVC, % of patients                           |                          |                             |                             |                                  |
| ≥10% decline or death                        | 21.8                     | 28.0                        | 21.7                        | 28.9                             |
| No decline                                   | 21.2                     | 16.3                        | 20.4                        | 15.8                             |
| 6MWD, % of patients                          |                          |                             |                             |                                  |
| ≥50-m decline or death                       | 24.1                     | 38.8                        | 26.6                        | 39.7                             |
| No decline                                   | 37.3                     | 33.4                        | 37.3                        | 32.9                             |
| UCSD SOBQ, % of patients                     |                          |                             |                             |                                  |
| ≥20-point change in UCSD SOBQ score or death | 18.0                     | 36.4                        | 21.4                        | 37.5                             |
| No decline                                   | 37.1                     | 24.9                        | 36.8                        | 23.1                             |

6 6MWD: 6-minute walk distance; FVC: forced vital capacity; UCSD SOBQ: University of  
 7 California—San Diego Shortness of Breath Questionnaire.

8 **Table S2.** Proportions of patients experiencing  $\geq 10\%$  decline in FVC or death,  $\geq 50\text{-m}$  decline in  
9 6MWD or death and  $\geq 20$ -point worsening of UCSD SOBQ score or death in the pooled  
10 pirfenidone population stratified by baseline FVC ( $\geq 80\%$  and  $< 80\%$  predicted) or baseline GAP  
11 index stage (GAP I and GAP II–III) at 12 months

| <b>Outcome at 12 Months</b>                         | <b>Baseline FVC <math>\geq 80\%</math></b> | <b>Baseline FVC <math>&lt; 80\%</math></b> | <b>Baseline GAP Stage I</b> | <b>Baseline GAP Stage II-III</b> |
|-----------------------------------------------------|--------------------------------------------|--------------------------------------------|-----------------------------|----------------------------------|
| Pooled pirfenidone population, n                    | 146                                        | 477                                        | 247                         | 376                              |
| FVC, % of patients                                  |                                            |                                            |                             |                                  |
| $\geq 10\%$ decline or death                        | 14.4                                       | 14.9                                       | 13.4                        | 15.7                             |
| No decline                                          | 37.7                                       | 25.2                                       | 31.2                        | 26.1                             |
| 6MWD, % of patients                                 |                                            |                                            |                             |                                  |
| $\geq 50\text{-m}$ decline or death                 | 16.8                                       | 27.2                                       | 19.7                        | 28.2                             |
| No decline                                          | 46.2                                       | 39.0                                       | 47.5                        | 36.2                             |
| UCSD SOBQ, % of patients                            |                                            |                                            |                             |                                  |
| $\geq 20$ -point change in UCSD SOBQ score or death | 18.1                                       | 25.8                                       | 17.4                        | 28.3                             |
| No decline                                          | 40.3                                       | 27.9                                       | 35.5                        | 27.7                             |

12 6MWD, 6-minute walk distance; FVC, forced vital capacity; UCSD SOBQ, University of  
13 California—San Diego Shortness of Breath Questionnaire.

14 **Table S3.** Linear change in FVC (percent predicted and L) without imputation through 12  
 15 months by treatment group and baseline FVC and GAP index stage

| <b>Slope (Year)*</b>      | <b>Pirfenidone<br/>2403 mg/day<br/>(N=477)</b> | <b>Placebo<br/>(N=454)</b> | <b>Mean<br/>Difference<sup>†</sup></b> | <b>Relative<br/>Difference, %<sup>‡</sup></b> | <b>P Value<sup>§</sup></b> |
|---------------------------|------------------------------------------------|----------------------------|----------------------------------------|-----------------------------------------------|----------------------------|
| FVC, % predicted          |                                                |                            |                                        |                                               |                            |
| Baseline FVC ≥80%         | -1.92                                          | -5.19                      | 3.269                                  | 63.0                                          | <0.0001                    |
| Baseline FVC <80%         | -3.66                                          | -5.95                      | 2.290                                  | 38.5                                          | <0.0001                    |
| Baseline GAP Stage I      | -2.93                                          | -5.78                      | 2.847                                  | 49.3                                          | <0.0001                    |
| Baseline GAP Stage II-III | -3.41                                          | -5.67                      | 2.262                                  | 39.9                                          | <0.0001                    |
| FVC, L                    |                                                |                            |                                        |                                               |                            |
| Baseline FVC ≥80%         | -0.083                                         | -0.187                     | 0.1047                                 | 55.9                                          | 0.0010                     |
| Baseline FVC <80%         | -0.149                                         | -0.238                     | 0.0891                                 | 37.5                                          | <0.0001                    |
| Baseline GAP Stage I      | -0.120                                         | -0.215                     | 0.0945                                 | 44.0                                          | 0.0002                     |
| Baseline GAP Stage II-III | -0.140                                         | -0.226                     | 0.0853                                 | 37.8                                          | <0.0001                    |

16 FVC, forced vital capacity.

17 \*Change from baseline was calculated as the 12-month value minus the baseline value.

18 <sup>†</sup>Difference in mean: (pirfenidone – placebo).

19 <sup>‡</sup>Relative difference in mean: 100\*(pirfenidone – placebo)/(|placebo|).

20 <sup>§</sup>Calculated from the mixed linear model comparing pirfenidone 2403 mg/day to placebo, with  
 21 change as the outcome variable; study (PIPF-004, PIPF-006 and PIPF-016), geographic region  
 22 (United States and the rest of the world) within study and assessment time by treatment as fixed  
 23 effects; baseline as a covariate; subject and subject by assessment time as random effects  
 24 with variance components covariance structure.
